# Supplementary material for: Incorporation of Peptides Targeting EGFR and FGFR1 into the Adenoviral Fiber Knob Domain and Their Evaluation as Targeted Cancer Therapies
Source: PubMed Central journal article supplement (PMC4442602; doi:10.1089/hum.2015.015), 2015-04-27
Supplement: Supp_Data.pdf [file Supp_Data.pdf]

## Supplementary Data

SUPPLEMENTARY TABLE S1. PRIMER SEQUENCES FOR FIBER MODIFICATIONS

| A. PRIMERS USED TO GENERATE DNA FRAGMENTS FOR INSERTION THROUGH HOMOLOGOUS RECOMBINATION |                                                                                                                       |
|------------------------------------------------------------------------------------------|-----------------------------------------------------------------------------------------------------------------------|
| Primer                                                                                   | Sequence (5'-3')                                                                                                      |
| GE11 F                                                                                   | <u>CTTAA</u> CGGAGACAAA <u>AACTAA</u> ACCTGTAAACACTAACCATTAACACTAAACGGTACACAGGAAACATACCCTGGTACGGCTACACCCCCAGAACGTGATC |
| GE11 R                                                                                   | TGTAGTTGGCCAGACCAGTCCCATGAAAATGACATAGAGTATGCACCTGGAGTTGTCTCCGATCACGTTCTGGGGGTGTAGCCGTACCAGTGGTA                       |
| M* F                                                                                     | TGTCAGTCAAGTTTACTTAAACGGGAGACAAAACCTGTAAACACTAACCATTAACACTAAACGGTACACAGGAAACAATGCAGCTGCCCTGGCCACC                     |
| M* R                                                                                     | CAAAATTTTCATTAATGTAGTTGGCCAGACCAGTCCCATGAAAATGACATAGAGTATGCACCTGGAGTTGTCTCCGGTGGCCAGGGCAGCTGCAT                       |
| LS F                                                                                     | TGTCAGTCAAGTTTACTTAAACGGGAGACAAAACCTGTAAACACTAACCATTAACACTAAACGGTACACAGGAAACAACACTGTCCCCCCCGGTACCCC                   |
| LS R                                                                                     | CAAAATTTTCATTAATGTAGTTGGCCAGACCAGTCCCATGAAAATGACATAGAGTATGCACCTGGAGTTGTCTCCGGGGTAACGGGGGGGGACAG                       |
| Scramble F                                                                               | TGTCAGTCAAGTTTACTTAAACGGGAGACAAAACCTGTAAACACTAACCATTAACACTAAACGGTACACAGGAAACAACACTGTATGCCCTGGCCAGCCC                  |
| Scramble R                                                                               | ATGAGTTAGTCCCAAATGTTGCTCCGATATAGCTTCCGTTAGTCCAGGTGATGAAAATGACATTTGAGTATGCACCTGGTGGCTGGGCCAGGGTTCATCAG                 |
| RPSL-neo                                                                                 | <u>GTCAGTCAAGTTTACTTAAACGGGAGACAAAACCTAA</u> ACCTGTAAACACTAACCATTAACACTAAACGGTACACAGGAAACAACCTGTGACGGAAAGATCACTTCG    |
| HI loop F                                                                                | <u>CAAAATTTTCATTAATGTAGTTGGCCAGACCAGTCCCATGAAAATGACATAGAGTATGCACCTGGAGTTGTCTCCCTGAGGTTCTTATGGCTCTTG</u>               |
| HI loop R                                                                                | <u>AGTTTTGACAGCACAGGTGCCATTACAGTAGGAAACAAAATAATGATAAGCTAACTTTGTGGACCACACCAGCTCCACCCTGTGACGGAAAGATCACTTCG</u>          |
| RPSL-neo                                                                                 | <u>CTGTAGCAAGTATTTGACTGCCACA</u> TTTTGTTAAGACCAAAAGTGAGTTTAGCATCTTCTCTGCAATTTAGTCTACAGTTCTGAGGTTCTTTATGGCTCTTG        |
| AB loop F                                                                                | <u>GAAACAAAATAATGATAAGCTAACTTTGTGGACCACACCAGTCCAGGGCCAACTGTAGACTAAATGCAGAGAAAAGATGCTAAACTCACTTTGGTCTT</u>             |
| AB loop R                                                                                |                                                                                                                       |
| KO1 mutation oligo                                                                       |                                                                                                                       |

  

| B. SEQUENCING PRIMERS |                        |
|-----------------------|------------------------|
| Primer                | Sequence (5'-3')       |
| HI loop               | GCCTATACAAAACGGCTGTTGG |
| AB loop               | GTTACCTAATGCACCAACAC   |

Regions with homology to Ad5.Luc DNA sequence are underlined. F, forward primer; GE11, YHWYGYTPQNV; KO1, hCAR-binding mutation; LS, LSPRYP; M\*, MQLPLAT; R, reverse primer; scramble, LMTLAQP.

Ad5 fiber knob HI loop was sequenced to verify successful peptide insertions and AB loop was sequenced to verify the KO1 (S408E, P409A) mutation.
